# Supplementary material for: Association Analysis in African Americans of European-Derived Type 2 Diabetes Single Nucleotide Polymorphisms From Whole-Genome Association Studies
Source: Oxford University Press journal article supplement (doi:10.2337/db07-1319), 2008-04-29
Supplement: db071319-sup-supplementaltables.doc [file db071319-sup-supplementaltables.doc]

Supplementary Table 1.  Genotype frequencies in AA cases and controls			
Gene	SNP	Chromosome	Major/ Minor Alleles	HWE P-value combined	HWE P-value cases	HWE P-value controls	T2DM-ESRD Cases                   frequency (n)	Controls                                      frequency (n)	
 	 	 					1/1	1/2	2/2	1/1	1/2	2/2	
PKN2	rs6698181	1p22.2	C/T	0.798	0.545	0.339	0.715 (700)	0.258 (253)	0.027 (26)	0.713 (739)	0.268 (278)	0.019 (20)	
IGF2BP2	rs4402960	3q27.2	T/G	0.593	0.848	0.321	0.277 (272)	0.503 (494)	0.221 (217)	0.284 (297)	0.483 (505)	0.233 (244)	
FLJ39370	rs17044137	4q25	T/A	0.291	0.426	0.484	0.460 (453)	0.428 (422)	0.112 (110)	0.456 (477)	0.432 (452)	0.113 (118)	
CDKAL1	rs10946398	6p22.3	C/A	0.550	1.000	0.410	0.378 (374)	0.474 (469)	0.148 (146)	0.332 (350)	0.500 (526)	0.168 (177)	
CDKAL1	rs7754840	6p22.3	C/G	0.432	0.840	0.340	0.378 (373)	0.477 (471)	0.146 (144)	0.334 (350)	0.500 (524)	0.165 (173)	
SLC30A8	rs13266634	8q24.11	C/T	0.775	0.300	0.556	0.836 (829)	0.160 (159)	0.004 (4)	0.837 (879)	0.154 (162)	0.009 (9)	
CDKN2B/CDKN2A	rs564398	9p21.3	T/C	0.700	0.362	0.801	0.888 (880)	0.111 (110)	0.001 (1)	0.873 (917)	0.123 (129)	0.005 (5)	
CDKN2B/CDKN2A	rs10811661	9p21.3	T/C	0.122	0.813	0.080	0.858 (851)	0.138 (137)	0.004 (4)	0.868 (911)	0.131 (138)	0.001 (1)	
IDE/KIF11/HHEX	rs1111875	10q23.33	C/T	0.754	0.585	0.341	0.602 (591)	0.344 (338)	0.054 (53)	0.581 (604)	0.370 (385)	0.049 (51)	
IDE/KIF11/HHEX	rs5015480	10q23.33	C/T	0.506	0.309	0.947	0.377 (369)	0.487 (477)	0.136 (133)	0.401 (418)	0.464 (483)	0.135 (141)	
IDE/KIF11/HHEX	rs7923837	10q23.33	G/A	0.755	0.811	0.418	0.863 (855)	0.133 (132)	0.004 (4)	0.843 (885)	0.149 (156)	0.009 (9)	
Intragenic	rs9300039	11p12	C/A	0.379	0.028	0.273	0.789 (777)	0.190 (187)	0.021 (21)	0.786 (821)	0.205 (214)	0.009 (9)	
LOC387761	rs7480010	11p12	G/A	0.133	0.103	0.614	0.797 (787)	0.185 (183)	0.017 (17)	0.737 (772)	0.241 (252)	0.022 (23)	
EXT2/ALX4	rs1113132	11p11.2	C/G	0.768	0.512	0.228	0.848 (838)	0.144 (142)	0.008 (8)	0.834 (871)	0.162 (169)	0.004 (4)	
EXT2/ALX4	rs11037909	11p11.2	T/C	0.517	0.358	0.897	0.741 (730)	0.236 (232)	0.023 (23)	0.743 (773)	0.237 (247)	0.019 (20)	
EXT2/ALX4	rs3740878	11p11.2	A/G	0.785	0.148	0.358	0.840 (825)	0.149 (146)	0.011 (11)	0.820 (860)	0.174 (183)	0.006 (6)	
FTO	rs8050136	16q12.2	C/A	0.822	0.083	0.188	0.314 (309)	0.468 (461)	0.218 (215)	0.296 (308)	0.515 (535)	0.189 (196)	
TCF7L2*	rs7903146	10q25.2	T/C	0.675	0.287	0.137	0.115 (108)	0.473 (443)	0.412 (386)	0.089 (89)	0.385 (385)	0.526 (525)	
													
* rs7903146 was genotyped in 964 cases and 1018 controls								


Supplementary Table 2.  Single-SNP tests of association with T2DM-ESRD						
Gene	SNP	European Reported Risk Allele	 Risk Allele Frequency Controls	 Risk Allele Frequency Cases	Additive P-value	OR (95% CI)	Dominant P-value	OR (95% CI)	Recessive P-value	OR (95% CI)	Admixture-Adjusted Additive    P-value	
PKN2	rs6698181	T	0.153	0.156	0.829	1.02 (0.86-1.21)	0.908	0.99 (0.81-1.20)	0.279	1.39 (0.77-2.50)	0.388	
IGF2BP2	rs4402960	T	0.525	0.528	0.865	1.01 (0.89-1.14)	0.501	1.07 (0.87-1.32)	0.714	0.96 (0.79-1.17)	0.803	
FLJ39370	rs17044137	A	0.329	0.326	0.854	0.99 (0.87-1.12)	0.846	0.98 (0.83-1.17)	0.939	0.99 (0.75-1.30)	0.747	
CDKAL1	rs10946398	C	0.582	0.615	0.029	1.15 (1.01-1.31)	0.203	1.17 (0.92-1.48)	0.032	1.22 (1.02-1.46)	0.110	
CDKAL1	rs7754840	C	0.585	0.616	0.039	1.14 (1.01-1.30)	0.225	1.16 (0.91-1.48)	0.043	1.21 (1.01-1.45)	0.136	
SLC30A8	rs13266634	C	0.914	0.916	0.861	1.02 (0.82-1.27)	0.179	2.14 (0.66-6.96)	0.946	0.99 (0.78-1.25)	0.543†	
CDKN2B/CDKN2A	rs564398	T	0.934	0.943	0.196	1.18 (0.91-1.53)	0.157	3.47 (0.57-21.15)	0.293	1.16 (0.89-1.51)	0.320†	
CDKN2B/CDKN2A	rs10811661	T	0.933	0.927	0.412	0.90 (0.71-1.15)	0.180	0.31 (0.05-2.00)	0.525	0.92 (0.72-1.18)	0.128†	
IDE/KIF11/HHEX	rs1111875	C	0.766	0.774	0.547	1.05 (0.90-1.21)	0.629	0.90 (0.61-1.34)	0.336	1.09 (0.91-1.30)	0.767	
IDE/KIF11/HHEX	rs5015480	C	0.633	0.621	0.412	0.95 (0.83-1.08)	0.975	1.00 (0.77-1.28)	0.259	0.90 (0.76-1.08)	0.400	
IDE/KIF11/HHEX	rs7923837	G	0.917	0.929	0.143	1.19 (0.94-1.50)	0.195	2.13 (0.65-6.95)	0.196	1.17 (0.92-1.50)	0.303†	
Intragenic	rs9300039	C	0.889	0.884	0.618	0.95 (0.78-1.15)	0.021	0.40 (0.18-0.88)	0.895	1.01 (0.82-1.26)	0.029†	
LOC387761	rs7480010	G	0.858	0.890	0.002	1.33 (1.11-1.60)	0.469	1.28 (0.68-2.41)	0.002	1.40 (1.14-1.72)	0.084	
EXT2/ALX4	rs1113132	C	0.915	0.920	0.579	1.07 (0.85-1.34)	0.240	0.47 (0.14-1.57)	0.393	1.11 (0.87-1.41)	0.221†	
EXT2/ALX4	rs11037909	T	0.862	0.859	0.768	0.97 (0.82-1.16)	0.527	0.82 (0.45-1.50)	0.917	0.99 (0.81-1.21)	0.511	
EXT2/ALX4	rs3740878	A	0.907	0.914	0.415	1.09 (0.88-1.36)	0.155	0.51 (0.19-1.38)	0.223	1.15 (0.92-1.46)	0.129†	
FTO	rs8050136	A	0.446	0.452	0.686	1.03 (0.91-1.16)	0.399	0.92 (0.76-1.11)	0.099	1.20 (0.97-1.49)	0.783	
TCF7L2	rs7903146	T	0.284	0.354	1.73x10-6	1.39 (1.21-1.58)	6.16x10-7	1.57 (1.32-1.88)	0.061	1.32 (0.99-1.78)	1.59x10-6	
												
†Minor allele homozygote count for either cases or controls was <10 and Dominant model is shown	


Supplementary Table 3:  Power to detect association in African Americans					
 		Power	
 	Additive Odds Ratio Range from Europeans	Risk Allele Frequency in AA	Additive Low	Additive Intermediate	Additive High	
SNP	Low	Intermediate	High	Controls	Cases	Combined	á=0.05	á=0.10	á=0.05	á=0.10	á=0.05	á=0.10	
rs13266634 	1.07	1.12	1.18	0.914	0.914	0.914	0.0920	0.1606	0.1694	0.2627	0.3021	0.4201	
rs1111875	1.10	1.13	1.14	0.764	0.772	0.768	0.2476	0.3578	0.3708	0.4945	0.4151	0.5403	
rs5015480	1.10	1.13	1.14	0.632	0.619	0.626	0.3131	0.4323	0.4697	0.5947	0.5233	0.6457	
rs7923837	1.09	1.11	1.12	0.915	0.926	0.921	0.1135	0.1897	0.1434	0.2293	0.1602	0.2510	
rs7480010	1.00	1.03	1.08	0.853	0.884	0.868	0.0500	0.1000	0.0618	0.1173	0.1309	0.2130	
rs9300039	1.13	1.25	1.48	0.890	0.883	0.887	0.2286	0.3354	0.5840	0.7010	0.9578	0.9794	
rs3740878	1.26	1.36	1.46	0.904	0.915	0.909	0.5302	0.6521	0.7595	0.8461	0.8979	0.9435	
rs11037909	1.27	1.37	1.47	0.859	0.859	0.859	0.7248	0.8192	0.9129	0.9529	0.9796	0.9909	
rs1113132	1.15	1.25	1.36	0.912	0.920	0.916	0.2273	0.3339	0.4752	0.5999	0.7283	0.8219	
rs10811661	1.19	1.20	1.20	0.932	0.926	0.929	0.2823	0.3978	0.3041	0.4224	0.3041	0.4224	
rs564398	1.05	1.12	1.13	0.931	0.941	0.936	0.0667	0.1244	0.1401	0.2250	0.1548	0.2441	
rs4402960	1.11	1.14	1.18	0.524	0.525	0.524	0.3866	0.5110	0.5545	0.6745	0.7537	0.8416	
rs7754840	1.08	1.12	1.16	0.582	0.613	0.597	0.2268	0.3332	0.4267	0.5520	0.6403	0.7500	
rs10946398	1.08	1.12	1.16	0.580	0.613	0.596	0.2269	0.3334	0.4270	0.5524	0.6407	0.7504	
rs8050136	1.11	1.17	1.23	0.446	0.451	0.449	0.3864	0.5109	0.7106	0.8079	0.9125	0.9527	
rs17044137	1.01	1.02	1.13	0.328	0.327	0.327	0.0526	0.1038	0.0603	0.1151	0.4602	0.5853	
rs6698181	1.01	1.11	1.21	0.156	0.159	0.157	0.0516	0.1023	0.2368	0.3451	0.6324	0.7433	
rs7903146	1.34	1.37	1.38	0.281	0.351	0.315	0.9912	0.9964	0.9966	0.9987	0.9975	0.9991	
													
The odds ratio ranges were obtained from recently published WGA studies in European-derived populations [1-6] 					
Power analysis for TCF7L2 was calculated using a population of 960 cases and 1000 controls					
